# Supplementary material for: Effects of the Annual Nitrogen Fertilization Rate on Vine Performance and Grape Quality for Winemaking: Insights from a Meta-Analysis
Source: Hindawi journal article supplement (doi:10.1155/2023/7989254), 2023-08-31

Figures S1 and S2 are provided as Supplementary Materials.

In Figure S1, the N rate featuring the maximum point density for the vine production parameters is plotted against the number of grid nodes on each axis in the Kernel Smoothing estimation. (a) Grape yield. (b) Pruning weight. (c) Bunch number. (d) Bunch weight. (e) Berry number. (f) Berry weight.

In Figure S2, the N rate featuring the maximum point density for the grape quality traits is plotted against the number of grid nodes on each axis in the Kernel Smoothing estimation. (a) Total Soluble Solids. (b) Titratable acidity. (c) Hydrogen ion activity. (d) Malic acid concentration. (e) Tartaric acid concentration. (f) Anthocyanins concentration. (g) Total polyphenol index. (h) Yeast Assimilable Nitrogen.

Figure S1


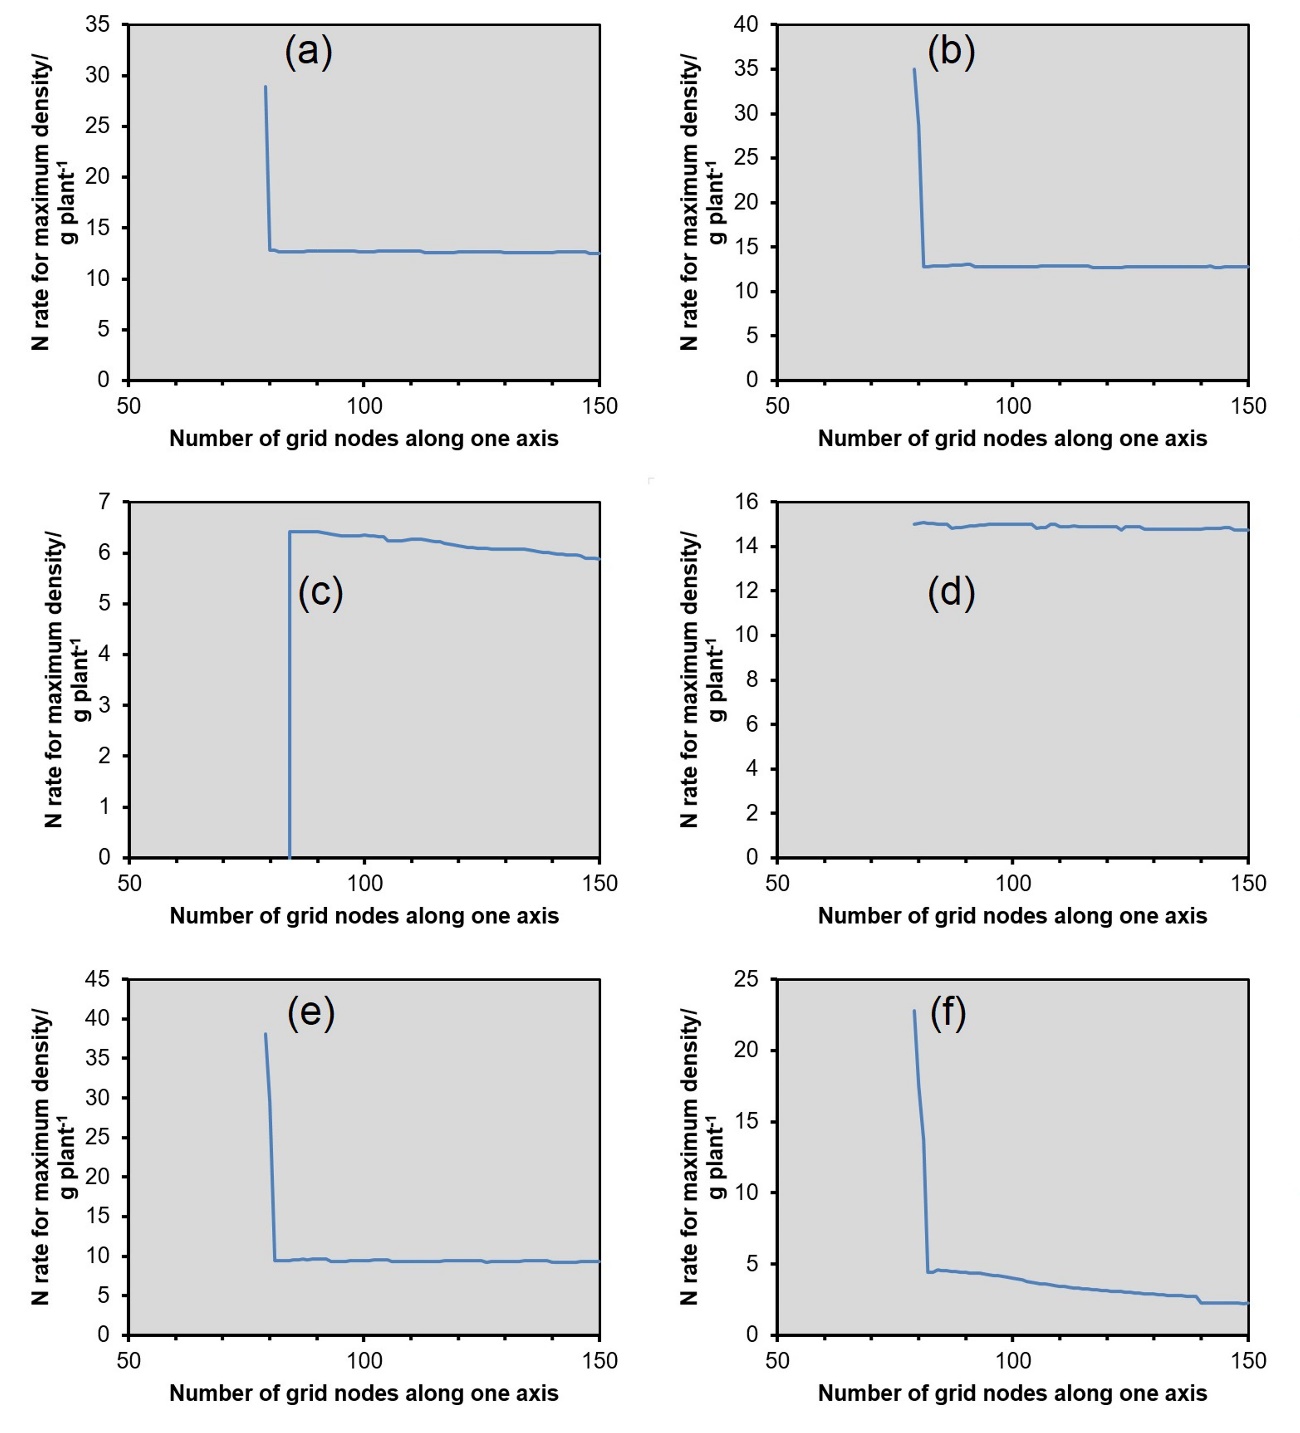


Figure S2


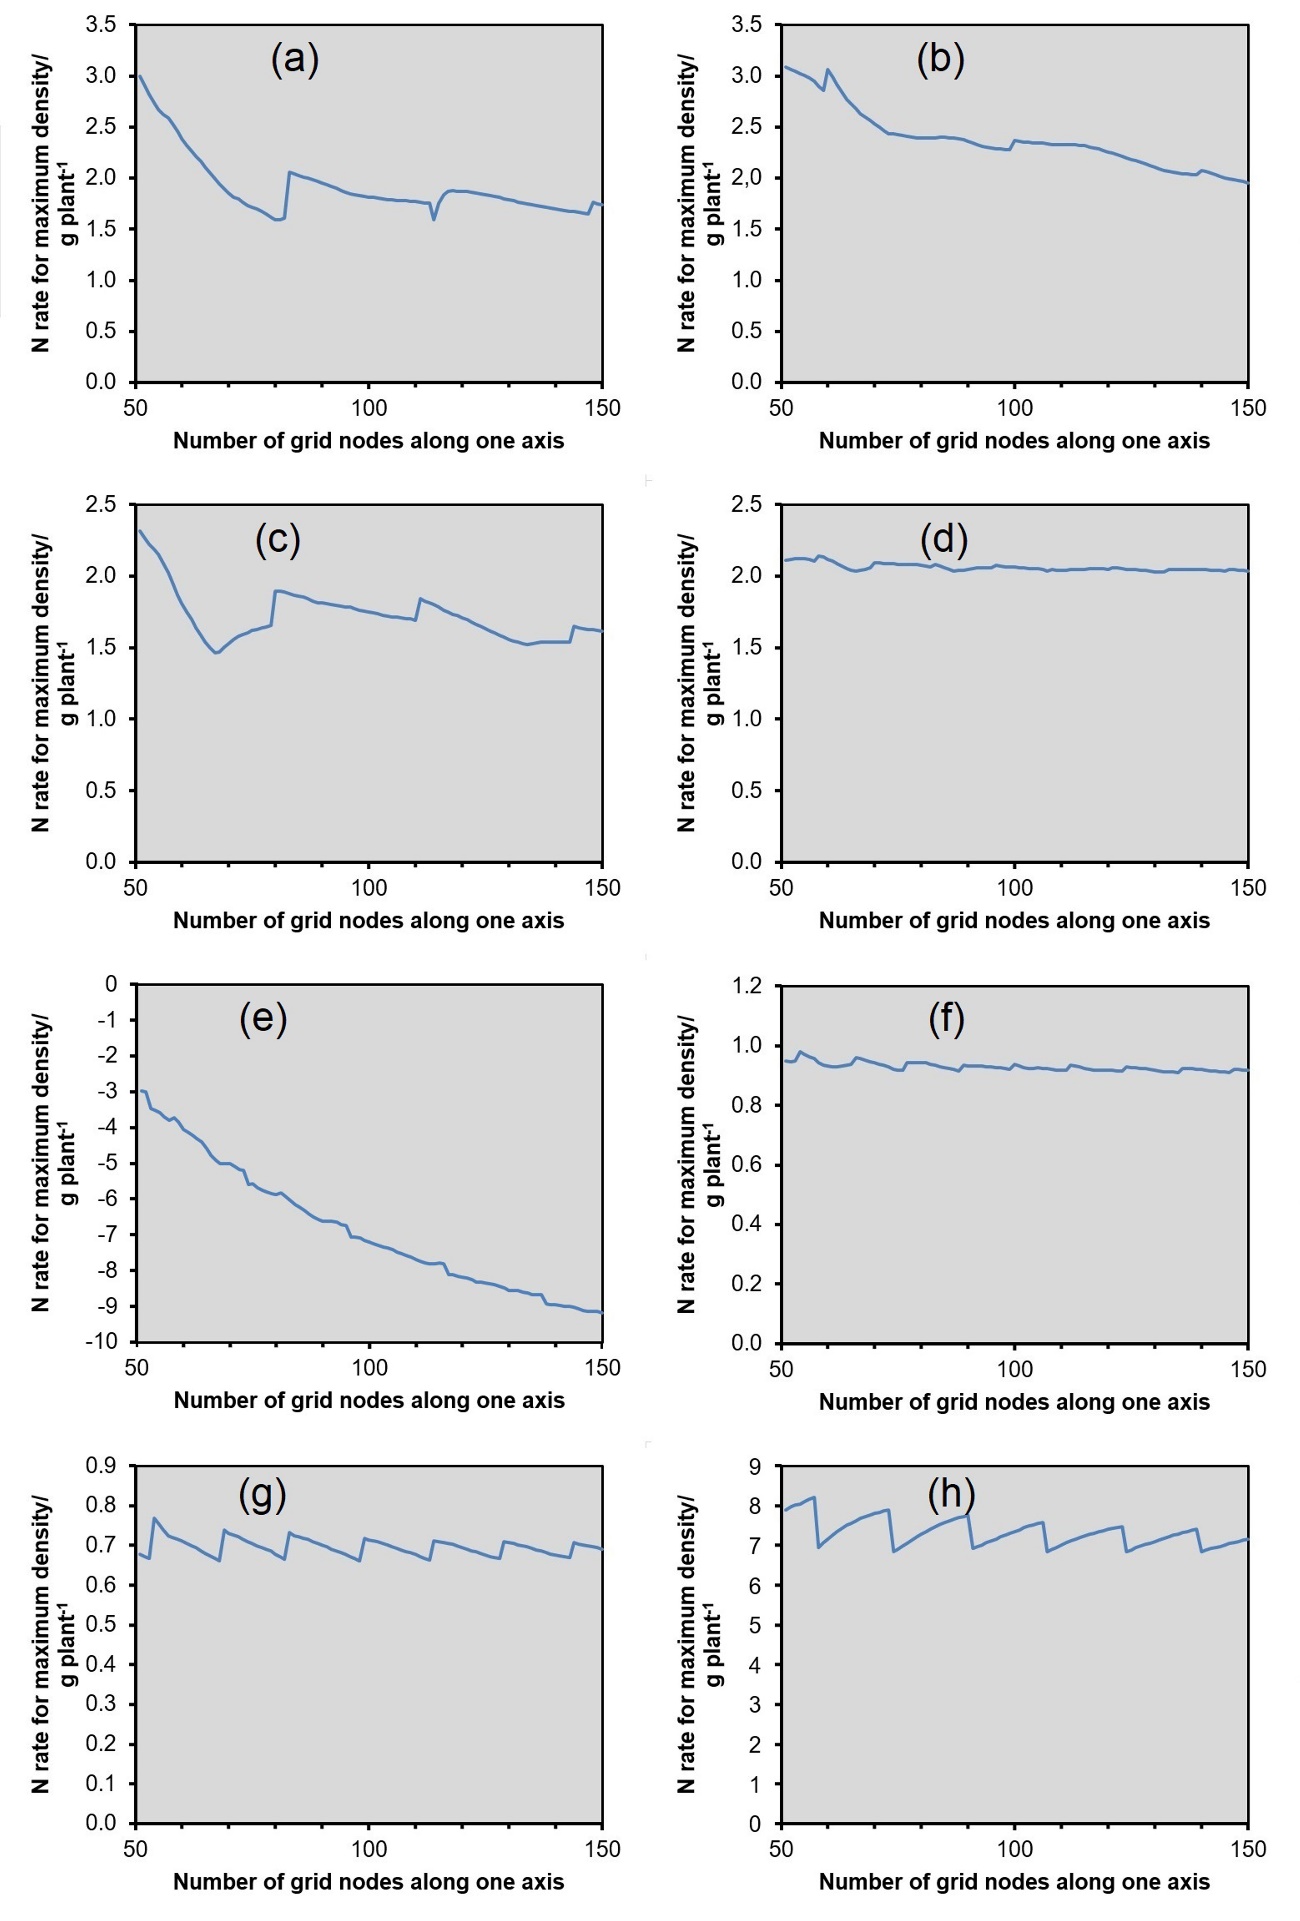

Supplement: f1 [file 7989254.f1.docx]
